# Supplementary material for: Intratumoral administration of the immunologic adjuvant AS01B in combination with autologous CD1c (BDCA-1)+/CD141 (BDCA-3)+ myeloid dendritic cells plus ipilimumab and intravenous nivolumab in patients with refractory advanced melanoma
Source: PubMed Central journal article supplement — J Immunother Cancer. 2024 Jan 11;12(1):e008148. doi: 10.1136/jitc-2023-008148 (PMC10806541; doi:10.1136/jitc-2023-008148), 2024-01-11

## Supplementary Figure 1

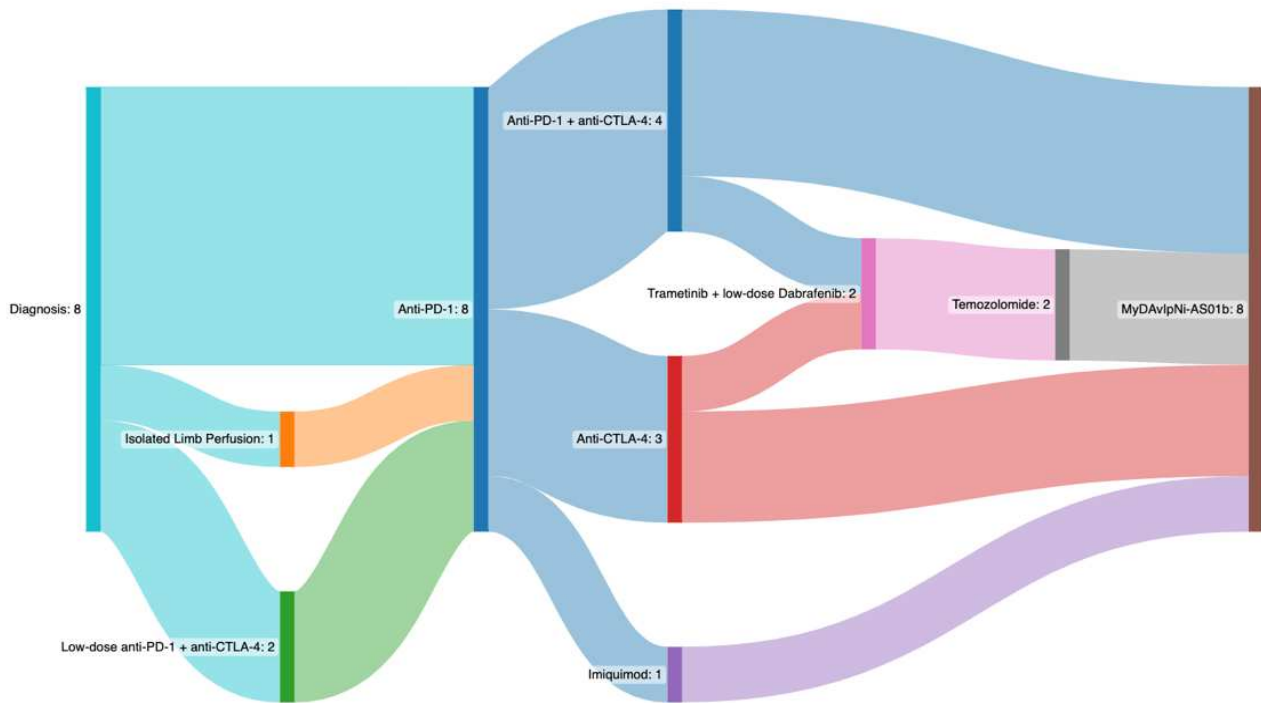

## Supplementary Figure 2

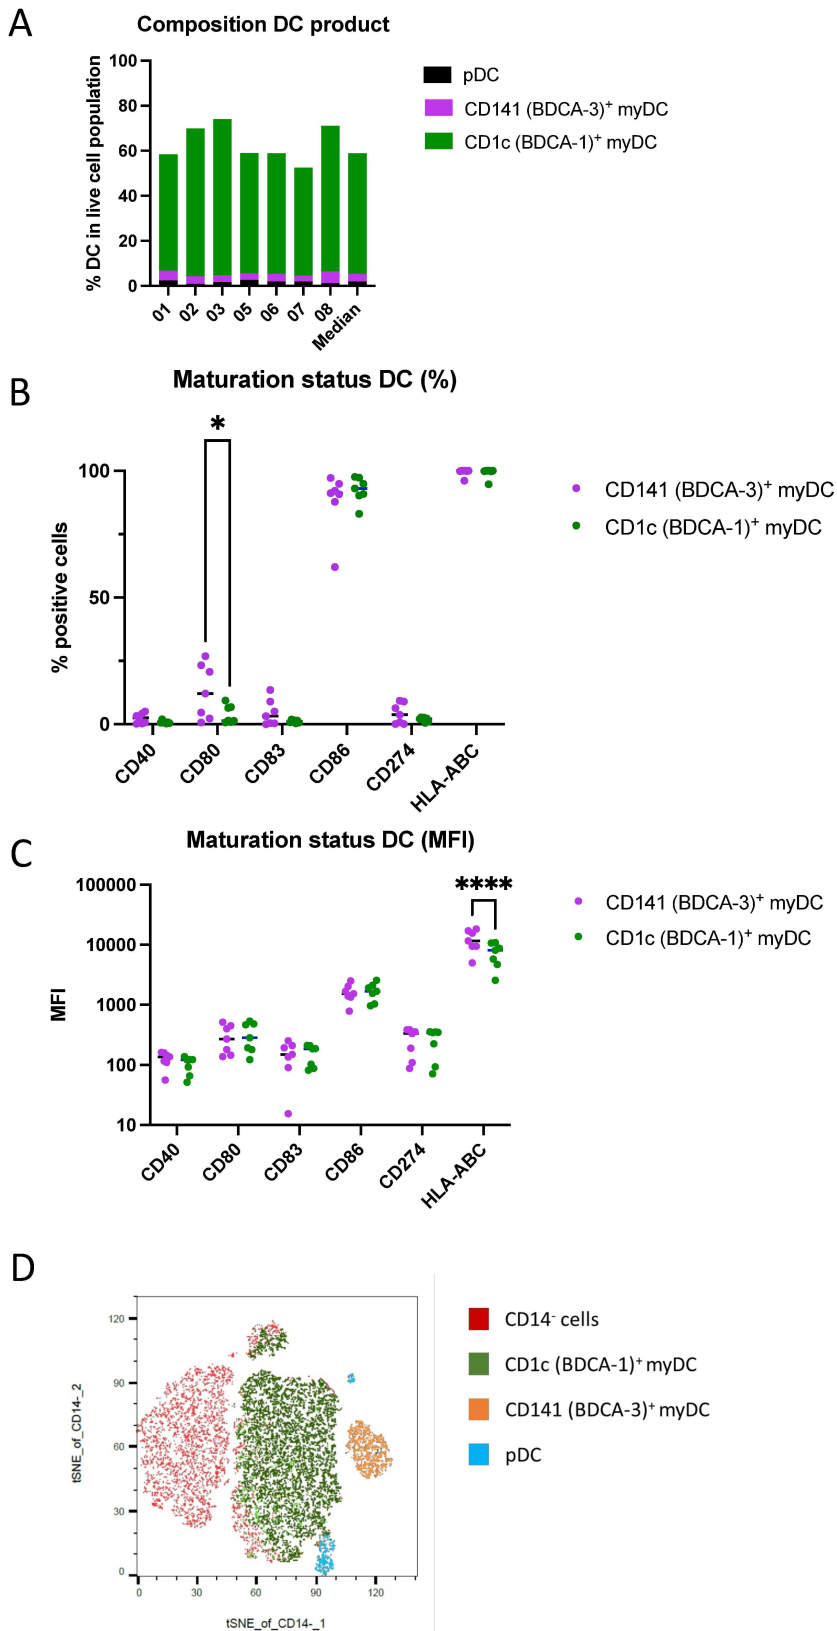

# Supplementary Figure 3

## Patient 1

Stage IV-M1a melanoma  
Refractory to nivolumab, ipilimumab/nivolumab, topical imiquimod  
NGS: MEK1

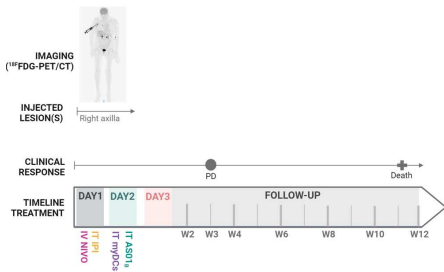

## Patient 2

Stage IV-M1c melanoma  
Refractory to nivolumab, ipilimumab/nivolumab, TLDD, TMZ  
NGS: SMARCA4, TP53, MSH6

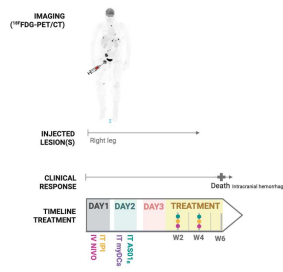

## Patient 3

Stage IV-M1a melanoma  
Refractory to pembrolizumab, ipilimumab/nivolumab  
NGS: SMARCA4, SMARCB1

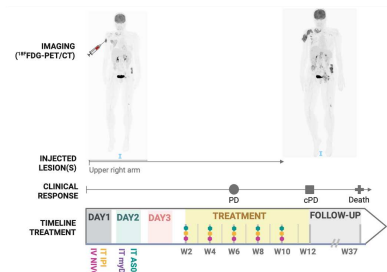

## Patient 4

Stage IV-M1a melanoma  
Refractory to pembrolizumab, isolated limb perfusion, monotherapy ipilimumab  
NGS: NRAS<sup>Q61</sup>

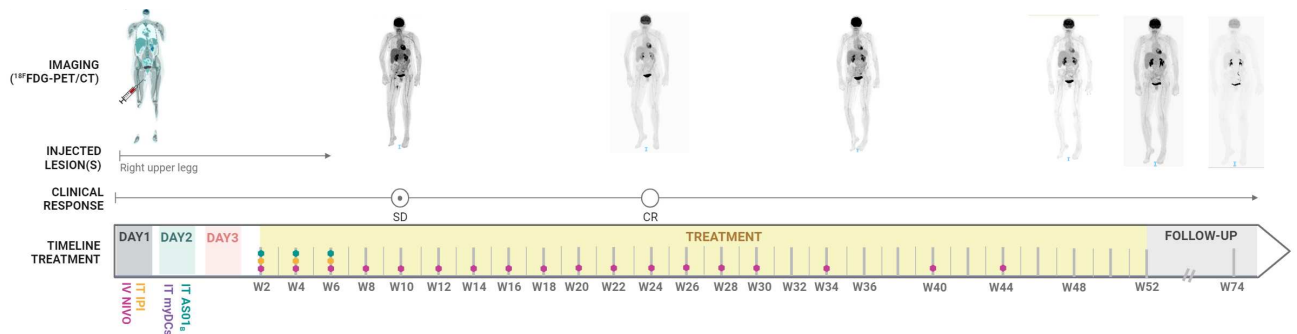

## Patient 8

Stage IV-M1a melanoma  
Refractory to nivolumab, ipilimumab/nivolumab, topical imiquimod  
NGS: MEK1

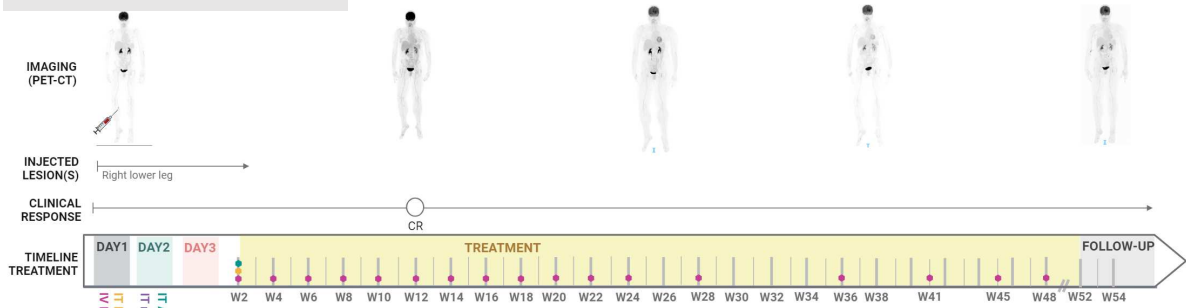

## Patient 5

Stage IV-M1c melanoma  
Refractory to nivolumab, monotherapy ipilimumab  
NGS: NRAS<sup>Q61</sup>

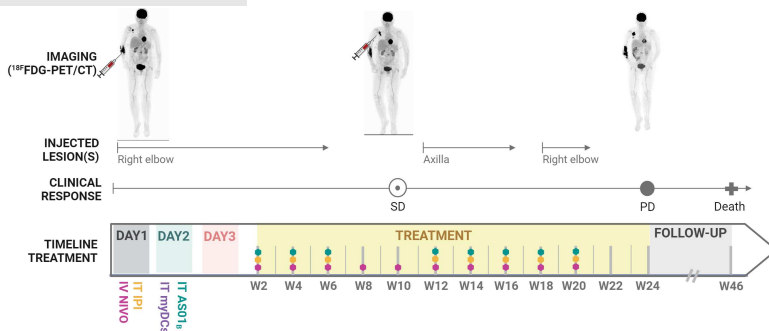

## Patient 6

Stage IV-M1a melanoma  
Refractory to nivolumab, ipilimumab/nivolumab  
NGS: NRAS<sup>Q61</sup>

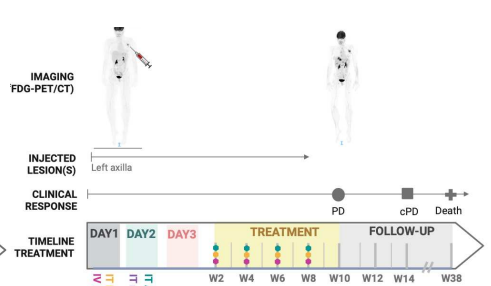

### Supplementary Figure 4

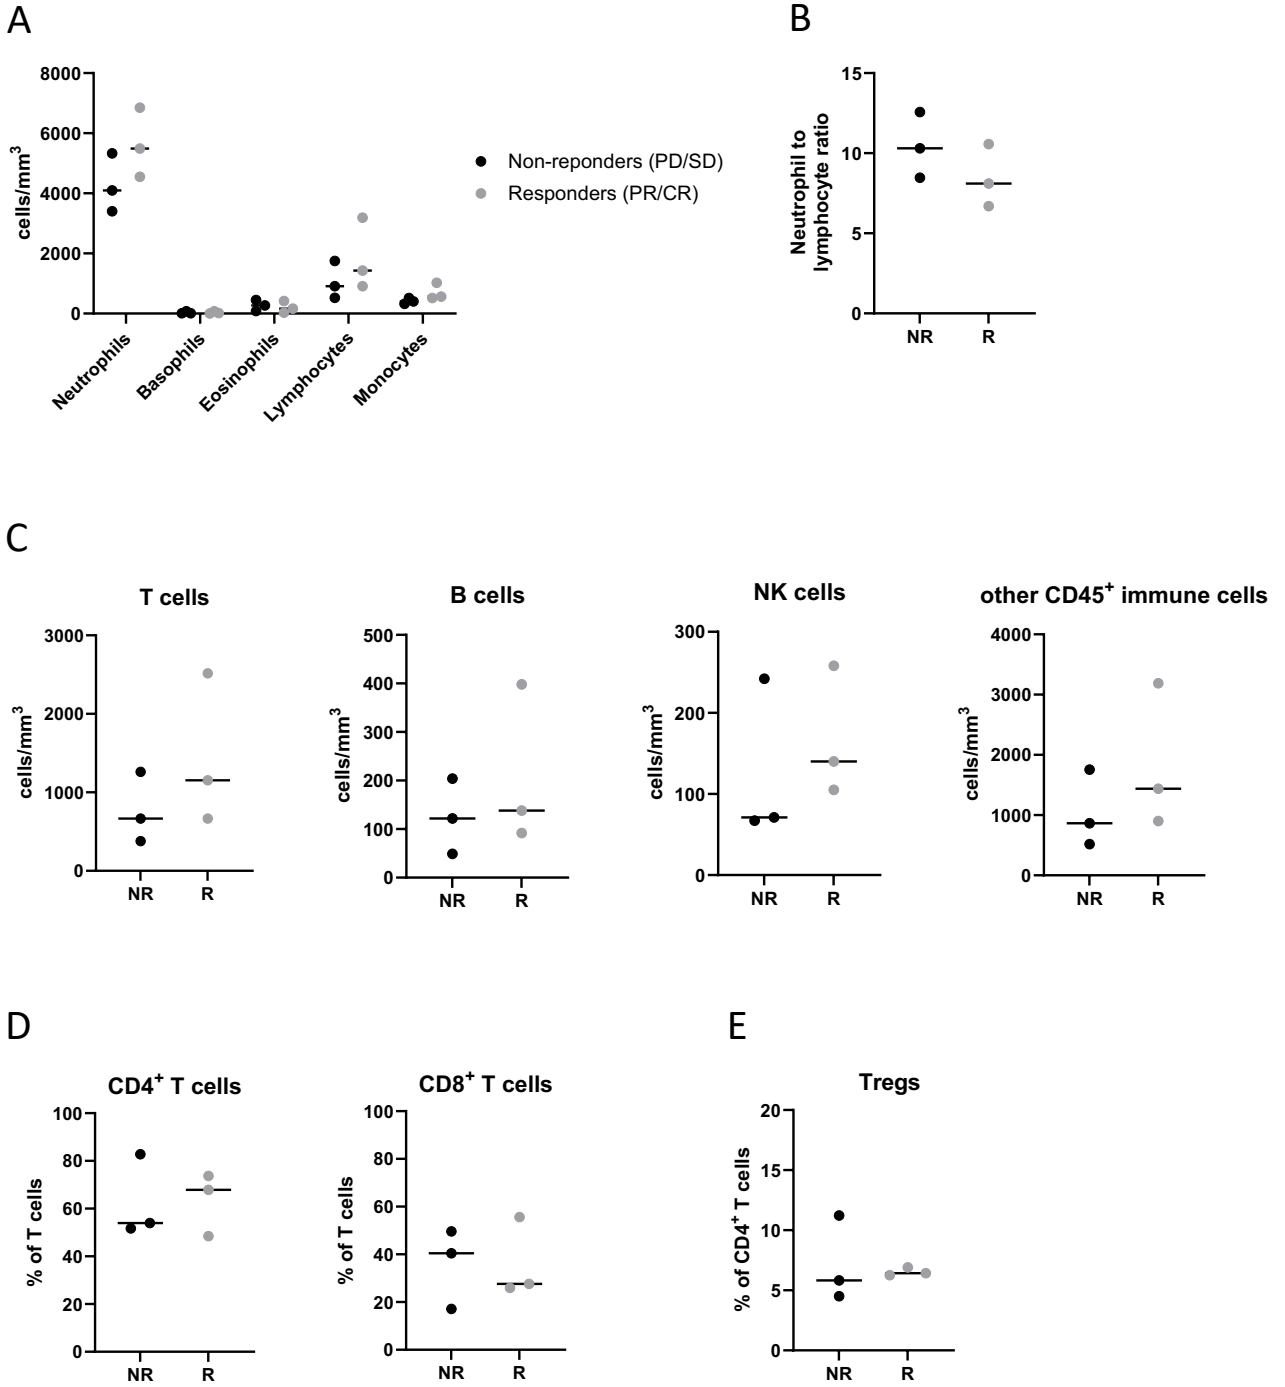

# Supplementary Figure 5

**A**

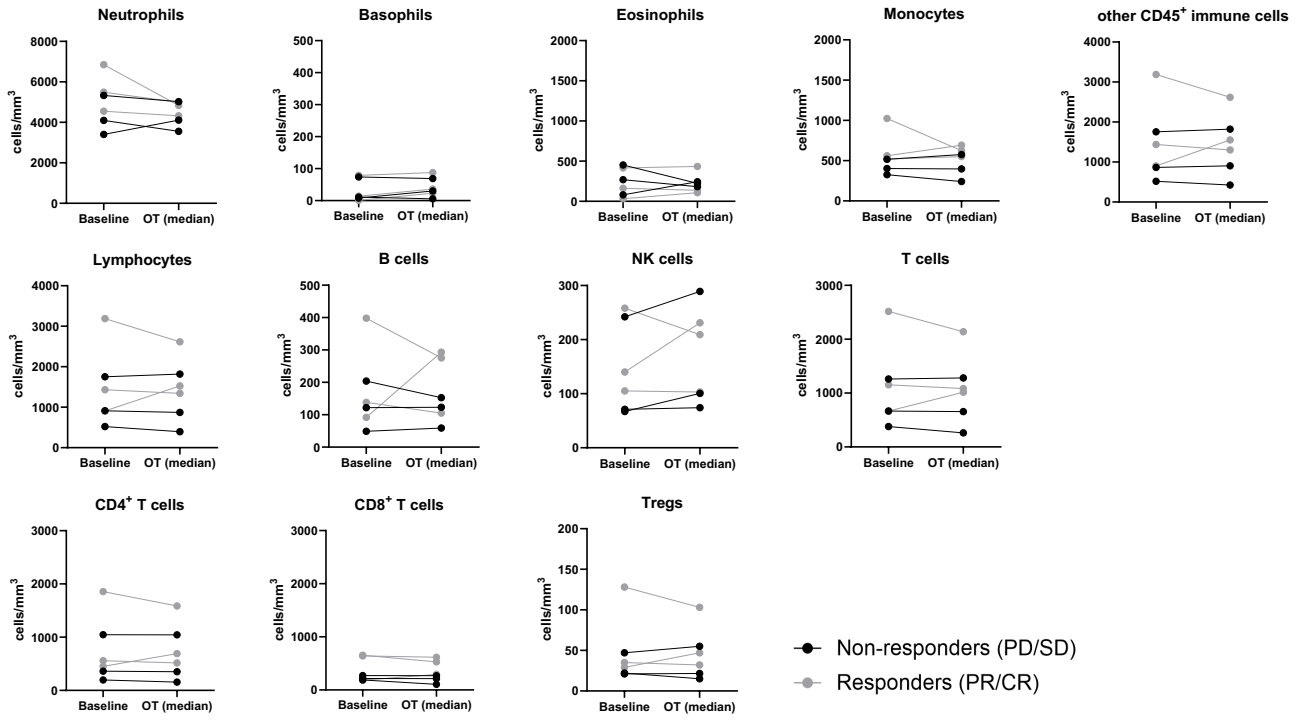

**B**

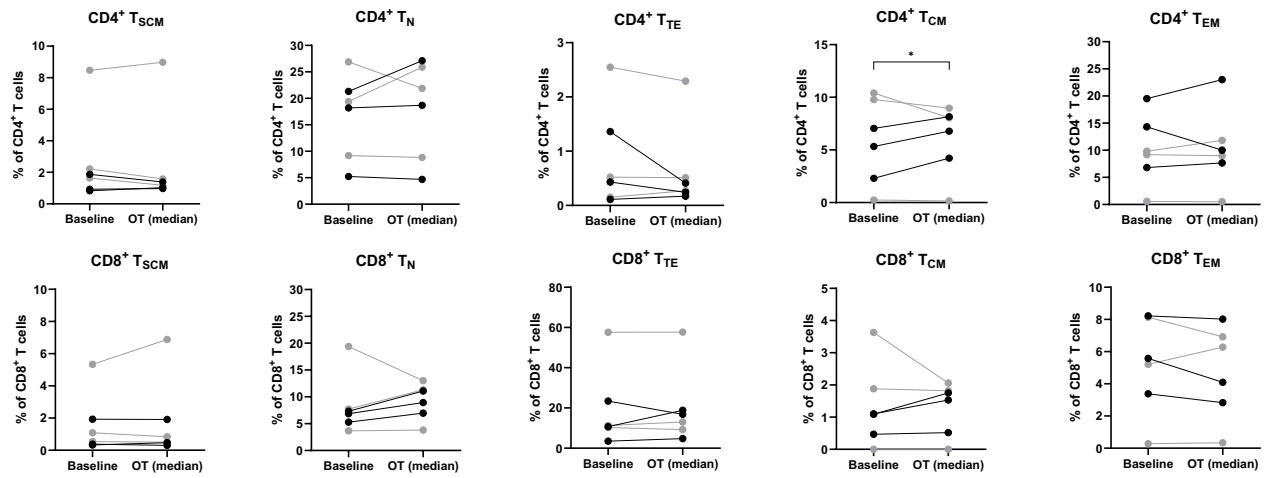

**C**

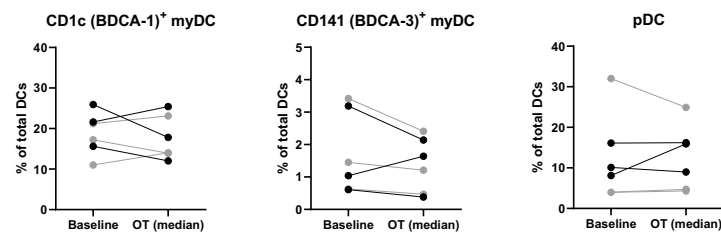

## A Supplementary Figure 6

B

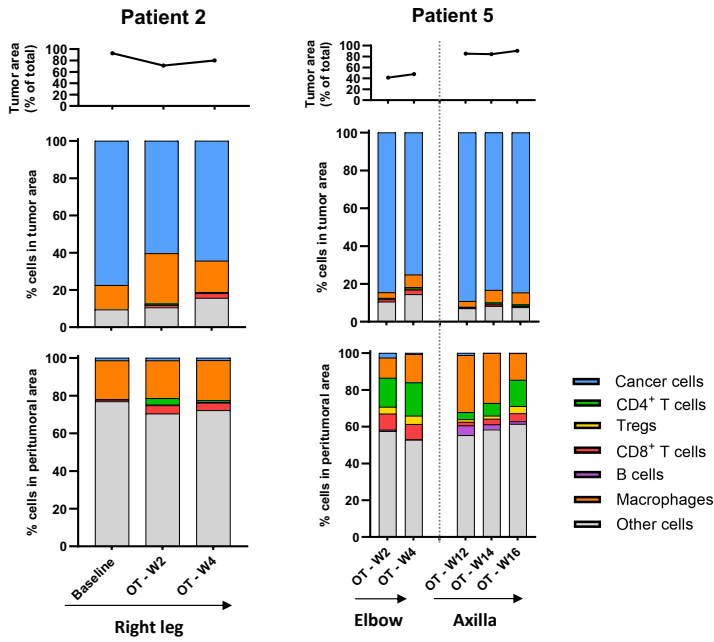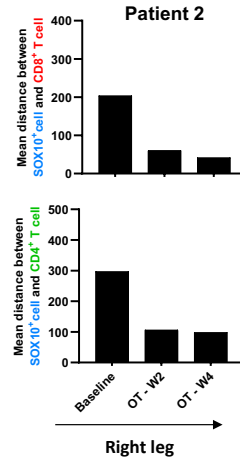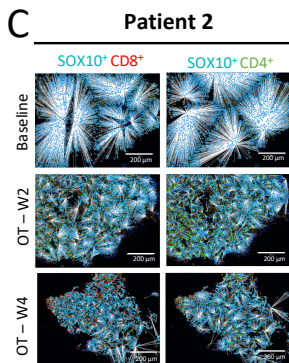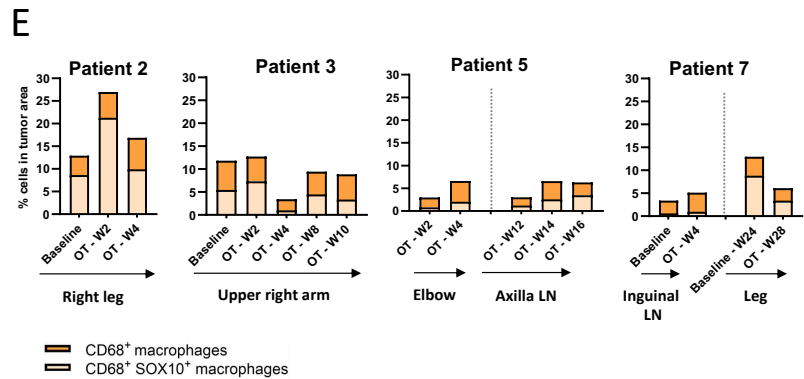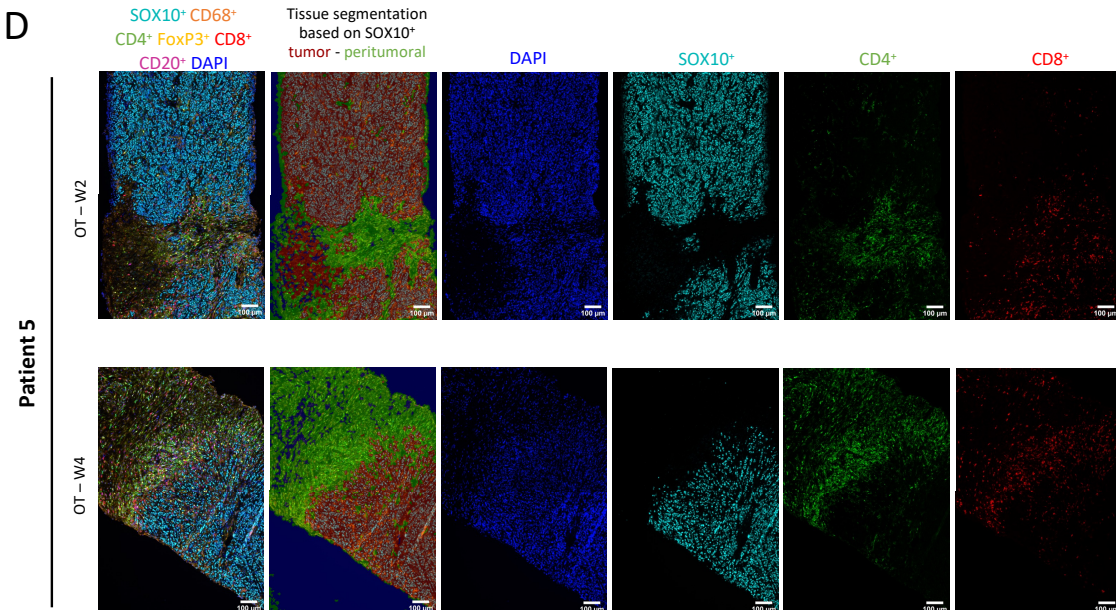

Supplement: jitc-2023-008148supp003.pdf [file jitc-2023-008148supp003.pdf]
