# Supplementary material for: Intratumoral administration of the immunologic adjuvant AS01B in combination with autologous CD1c (BDCA-1)+/CD141 (BDCA-3)+ myeloid dendritic cells plus ipilimumab and intravenous nivolumab in patients with refractory advanced melanoma
Source: PubMed Central journal article supplement — J Immunother Cancer. 2024 Jan 11;12(1):e008148. doi: 10.1136/jitc-2023-008148 (PMC10806541; doi:10.1136/jitc-2023-008148), 2024-01-11
Supplement: jitc-2023-008148supp001.pdf [file jitc-2023-008148supp001.pdf]

## 1 Supplementary Tables

2 **Supplementary Table 1.** mIHC staining workflow

| Staining order | Marker | Clone   | Reference              | Marker Dilution                  | Opal Pairing | Opal Dilution |
|----------------|--------|---------|------------------------|----------------------------------|--------------|---------------|
| 1st            | CD20   | L26     | Abcam ab9475           | 400X*<br>* unknown concentration | Opal 620     | 100X          |
| 2nd            | CD4    | EP204   | Cell Marque 104R-24    | 100 ng/ml                        | Opal 520     | 150X          |
| 3rd            | CD8    | C8/144B | Cell Signaling 70306S  | 125 ng/ml                        | Opal 540     | 200X          |
| 4th            | FOXP3  | 236A/E7 | ebioscience 14-4777-82 | 10 µg/ml                         | Opal 650     | 200X          |
| 5th            | CD68   | D4B9C   | Cell signaling 76437S  | 584 ng/ml                        | Opal 690     | 100X          |
| 6th            | Sox10  | E6B6I   | Cell signaling 69661S  | 250 ng/ml                        | Opal 570     | 50X           |

3

4 **Supplementary Table 2.** myDC cell counts of individual patients after volume reduction (before IT injection)

| Patient | CD1c (BDCA-1) <sup>+</sup><br>myDC (x10 <sup>6</sup> ) | CD141 (BDCA-3) <sup>+</sup><br>myDC (x10 <sup>6</sup> ) | Total myDC<br>(x10 <sup>6</sup> ) |
|---------|--------------------------------------------------------|---------------------------------------------------------|-----------------------------------|
| 1       | 19,24                                                  | 1,6                                                     | 20,9                              |
| 2       | 28,88                                                  | 2,6                                                     | 31,4                              |
| 3       | 19,45                                                  | 1,1                                                     | 20,5                              |
| 4       | 18,76                                                  | 3,5                                                     | 22,3                              |
| 5       | 15,24                                                  | 1,2                                                     | 16,4                              |
| 6       | 16,21                                                  | 1,6                                                     | 17,8                              |
| 7       | 29,58                                                  | 2,1                                                     | 31,6                              |
| 8       | 33,47                                                  | 3,1                                                     | 36,6                              |
| Median  | 19,34                                                  | 1,85                                                    | 21,57                             |

5

6

7

8

9

10 *Supplementary Table 3: Full list of adverse events according to Common Terminology Criteria for Adverse Events (CTCAE) v5.0*

| <b>Adverse Event (CTCAE v5.0)</b> | <b>1</b>  | <b>2</b>  | <b>3</b> | <b>4</b> | <b>5</b> | <b>Any Grade</b> |
|-----------------------------------|-----------|-----------|----------|----------|----------|------------------|
| Abdominal distension              | 1         |           |          |          |          | 1                |
| Alopecia                          | 1         |           |          |          |          | 1                |
| Anemia                            | 1         |           |          |          |          | 1                |
| Anorexia                          | 1         |           |          |          |          | 1                |
| Arthralgia                        | 2         |           |          |          |          | 2                |
| Back pain                         |           | 1         |          |          |          | 1                |
| Chills                            | 1         |           |          |          |          | 1                |
| Constipation                      | 1         |           |          |          |          | 1                |
| Diverticulitis                    |           | 1         |          |          |          | 1                |
| Dry mouth                         | 1         |           |          |          |          | 1                |
| Dyspepsia                         | 2         |           |          |          |          | 2                |
| Dyspnea                           | 1         |           |          |          |          | 1                |
| Eczema                            |           | 1         |          |          |          | 1                |
| Edema limbs                       | 1         |           |          |          |          | 1                |
| Erythema multiforme               | 1         |           |          |          |          | 1                |
| Fall                              |           | 1         |          |          |          | 1                |
| Fatigue                           | 5         | 2         |          |          |          | 7                |
| Fever                             | 1         |           |          |          |          | 1                |
| Headache                          | 1         |           |          |          |          | 1                |
| Herpes Simplex reactivation       |           | 1         |          |          |          | 1                |
| Injection site reaction           | 5         |           |          |          |          | 5                |
| Insomnia                          | 1         |           |          |          |          | 1                |
| Intracranial hemorrhage           |           |           |          |          | 1        | 1                |
| Irregular menstruation            | 1         |           |          |          |          | 1                |
| Lymphedema                        | 1         |           |          |          |          | 1                |
| Lymphocyte count decreased        |           |           | 1        |          |          | 1                |
| Malaise                           | 1         |           |          |          |          | 1                |
| Muscle cramp                      | 3         |           |          |          |          | 3                |
| Muscle weakness lower limb        | 1         |           |          |          |          | 1                |
| Nausea                            | 2         |           |          |          |          | 2                |
| Pain                              | 2         | 3         |          |          |          | 5                |
| Phlebitis                         |           | 1         |          |          |          | 1                |
| Platelet count increased          | 1         |           |          |          |          | 1                |
| Stomach pain                      | 1         |           |          |          |          | 1                |
| Thromboembolic event              | 1         |           |          |          |          | 1                |
| Thrush                            |           | 1         |          |          |          | 1                |
| Upper respiratory infection       | 1         |           |          |          |          | 1                |
| Vomiting                          |           | 1         |          |          |          | 1                |
| Wheezing                          | 1         |           |          |          |          | 1                |
| <b>Total</b>                      | <b>42</b> | <b>13</b> | <b>2</b> |          | <b>1</b> | <b>58</b>        |

11

12

13 **Supplementary Table 4** Individual patient characteristics, responses, and survival.

| Patient | Driver Mutation           | Disease stage | # IV treatments     | # IT treatments | Response in injected lesion(s) | BOR (iRECIST) | PFS (weeks) | OS (weeks) |
|---------|---------------------------|---------------|---------------------|-----------------|--------------------------------|---------------|-------------|------------|
| 1       | NRAS                      | IV-M1c        | 1                   | 1               | NE                             | NE            | 3+          | 11         |
| 2       | TP53;<br>MSH6;<br>SMARCA4 | IV-M1c        | 3                   | 3               | NE                             | NE            | 6           | 6          |
| 3       | SMARCB1;<br>SMARCA4       | IV-M1a        | 6                   | 6               | PD                             | PD            | 6           | 37         |
| 4       | NRAS                      | IV-M1a        | 17 + 2 <sub>a</sub> | 4               | CR                             | CR            | 75+         | 75+        |
| 5       | NRAS                      | IV-M1c        | 11                  | 9               | CR/PD                          | SD            | 24          | 45.3       |
| 6       | NRAS                      | IV-M1a        | 5                   | 5               | PD                             | PD            | 10          | 38.4       |
| 7       | GNAQ                      | IV-M1c        | 24+1 <sub>a</sub>   | 12              | CR/CR/CR                       | PR            | 55+         | 55+        |
| 8       | MEK1                      | IV-M1a        | 12 + 6 <sub>a</sub> | 2               | CR                             | CR            | 54+         | 54+        |

14 *BOR: best objective response, NE: not evaluable, PD: progressive disease, CR: complete remission, PR: partial response, SD:*15 *stable disease, +: censored (event not reached), <sub>a</sub> These patients were electively switched to standard dosing of nivolumab*16 *480 mg q4w until the planned end of study treatment to reduce travel burden since these patients were no longer receiving*17 *IT treatment after respectively 40 (patient 4), 49 (patient 7) and 24 weeks (patient 8).*

18
