# Supplementary material for: Intratumoral administration of the immunologic adjuvant AS01B in combination with autologous CD1c (BDCA-1)+/CD141 (BDCA-3)+ myeloid dendritic cells plus ipilimumab and intravenous nivolumab in patients with refractory advanced melanoma
Source: PubMed Central journal article supplement — J Immunother Cancer. 2024 Jan 11;12(1):e008148. doi: 10.1136/jitc-2023-008148 (PMC10806541; doi:10.1136/jitc-2023-008148), 2024-01-11
Supplement: jitc-2023-008148supp005.pdf [file jitc-2023-008148supp005.pdf]

## 1 [Supplementary methods](#)

### 2 *Characterization of the myeloid dendritic cell product*

3 Purity of the isolated CD1c (BDCA-1)<sup>+</sup>/CD141 (BDCA-3)<sup>+</sup> myDC product was analyzed by flow cytometry  
4 (BD LSR Fortessa) using the following fluorescently-labeled monoclonal antibodies: CD45 PE (clone  
5 REA747, Miltenyi Biotec), 7-AAD (Invitrogen), CD14 FITC (clone 61D3, Biolegend), CD141 (BDCA-3) PE-  
6 Cy7 (clone JAA17, eBioscience), CLEC9A APC (clone 8F9, Biolegend), CD123 APC-Vio770 (clone REA918,  
7 Miltenyi Biotec), CD11c AF700 (clone B-ly6, BD Biosciences), CD1c (BDCA-1) BV510 (clone F10/21A3,  
8 BD Biosciences) and FcεR VioBlue (clone CRA1, Miltenyi Biotec). Cells were first gated based on FSC/SSC  
9 characteristics, followed by gating on single cells. Next, dead cells were excluded and CD45<sup>+</sup> cells were  
10 gated, followed by the exclusion of CD14<sup>+</sup> cells. On this gate, pDC were identified as CD11c<sup>-dim</sup> CD123<sup>+</sup>  
11 cells. On the non-pDC gate, CD141 (BDCA-3)<sup>+</sup> myDC (or cDC1) were identified as CD11c<sup>low/+</sup> CD141<sup>+</sup> cells  
12 and CLEC9A expression by these cells was analyzed. On the non-cDC1 gate, CD1c (BDCA-1)<sup>+</sup> myDC (or  
13 cDC2) were identified as CD11c<sup>+</sup> CD1c<sup>+</sup> FcεR<sup>+</sup> cells. Data were analyzed using FlowJo version 7.6.  
14 Predefined release criteria were a cell viability and a purity of >50%.

15 Maturation status of the isolated CD1c (BDCA-1)<sup>+</sup>/CD141 (BDCA-3)<sup>+</sup> myDC product was analyzed by  
16 flow cytometry (BD LSR Fortessa) using the following fluorescently-labeled monoclonal antibodies:  
17 CD11c Alexa Fluor 700 (clone B-ly6, BD Biosciences), CD1c BV510 (clone F10/21A3, BD Biosciences),  
18 CD141 PE/Cy7 (clone JAA17, eBioscience), CD274 PE-Dazzle594 (clone EH12.2H7, Biolegend), CD86  
19 BV421 (clone IT2.2, BD Biosciences), CD83 PE (clone HB15E, BD Biosciences), CD40 APC (clone 5C3, BD  
20 Biosciences), CD80 PE-Cy5 (clone L307.4, BD Biosciences), HLA-ABC FITC (clone G46 2.6, BD  
21 Biosciences) and Zombie yellow (Biolegend). Cells were first gated based on FSC/SSC characteristics,  
22 followed by gating on single cells. Next, dead cells were excluded and DCs were gated as CD11c<sup>+</sup> CD1c<sup>+</sup>  
23 (cDC2) and CD11c<sup>low</sup> CD141<sup>+</sup> (cDC1). On each DC subtype, the expression of the maturation markers  
24 was assessed. Data were analyzed using FlowJo version 7.6.

### 25 *Determination of lymphocyte subsets in peripheral blood*

26 Lymphocyte subsets in peripheral blood were assessed using the BD Multitest 6-color TBNK kit (BD  
27 Biosciences). Briefly, whole blood was stained with the BD Multitest 6-color TBNK reagent (containing  
28 CD3 FITC, CD16 PE, CD56 PE, CD45 PerCP-Cy5.5, CD4 PE-Cy7, CD19 APC and CD8 APC-Cy7), followed  
29 by red blood cell lysis and acquisition on a BD FACS Lyric flow cytometer. Flow cytometry data were  
30 analyzed using the BD FACSSuite software (version 1.5). For analysis, cells were gated on FSC/SSC  
31 characteristics to remove debris followed by gating on SSC-A<sup>lo</sup> CD45<sup>+</sup> cells as a first step to select the  
32 lymphocyte population. Next, monocytes were excluded by their CD3<sup>-</sup> CD4<sup>lo</sup> expression. On the  
33 monocyte-excluded lymphocyte population, B- and T lymphocytes were gated using CD19 and CD3  
34 respectively. NK cells were identified as CD19<sup>-</sup> CD3<sup>-</sup> CD56<sup>+</sup>/CD16<sup>+</sup> cells and a small population of CD3<sup>+</sup>  
35 NK-T cells was identified as CD3<sup>+</sup> CD56<sup>+</sup>/CD16<sup>+</sup> cells. The CD3<sup>+</sup> T lymphocytes have been further  
36 subdivided into a CD4<sup>+</sup>, CD8<sup>+</sup>, CD4<sup>-</sup>CD8<sup>-</sup> and CD4<sup>+</sup>CD8<sup>+</sup> population.

37 Tregs in peripheral blood were assessed by a flow cytometric stain-lyse-wash procedure. 50 µl of  
38 peripheral blood was stained with CD3 FITC (BD Biosciences, clone SK7, 10µl); CD4 APC (BD Biosciences,  
39 clone SK3, 3µl); CD25 BV786 (BD Biosciences, clone M-A251, 3µl) and CD45 V500 (BD Biosciences, clone  
40 2D1, 3µl) and incubated for 10 min at room temperature. Red blood cell lysis was performed by adding  
41 200 µL of Optilyse C (Beckman Coulter). After washing with 2 ml FACSFlow buffer (sheath fluid, BD  
42 Biosciences), the cells were resuspended in 0.5 ml FACSFlow buffer. Analysis was performed on a  
43 FACSLyric (BD) flow cytometer. Lymphocytes were gated as SSC-A<sup>lo</sup> CD45<sup>+</sup>, with exclusion of  
44 contaminating monocytes by a CD3<sup>-</sup>CD4<sup>weak+</sup> gate. Within the monocyte-excluded lymphocyte  
45 population, Tregs were identified as CD3<sup>+</sup>CD4<sup>+</sup>CD25<sup>hi</sup> cells.

46 Absolute cell numbers were calculated based on the whole blood cell (WBC) count and percentage of  
47 lymphocyte subsets (obtained by an Abbott Alinity hq hematology analyzer).

48 Finally, we evaluated the evolution of DC subsets and memory T cell subsets in PBMC. For  
49 characterization of DC subsets, PBMC were stained with the following fluorescently-labeled  
50 antibodies: 7-AAD (Invitrogen), CD14 FITC (clone 61D3, Biolegend), CD3 APC-Fire750, CD19 APC-

51 Fire750, CD11c AF700 (clone B-ly6, BD Biosciences), CD141 (BDCA-3) PE-Cy7 (clone JAA17,  
52 eBioscience), CD123 PE-Cy5, HLA-DR BV785 and CD1c (BDCA-1) BV510 (clone F10/21A3, BD  
53 Biosciences). Samples were acquired on a BD FACSSymphony A1 flow cytometer (BD Biosciences). To  
54 remove debris, cells were first gated on FSC/SSC characteristics, followed by gating on single cells and  
55 exclusion of dead cells. Next, total DCs were gated as CD14<sup>-</sup> CD19<sup>-</sup> CD3<sup>-</sup> HLA-DR<sup>+</sup> cells. On the total DC  
56 gate, pDC were identified as CD11c<sup>-</sup> CD123<sup>+</sup> cells. On the non-pDC gate, CD141 (BDCA-3)<sup>+</sup> myDC (or  
57 cDC1) were identified as CD11c<sup>low/+</sup> CD141<sup>+</sup> cells. On the non-cDC1 gate, CD1c (BDCA-1)<sup>+</sup> myDC (or  
58 cDC2) were identified as CD11c<sup>+</sup> CD1c<sup>+</sup> cells. DC frequencies are shown as percentage of total DCs.  
59 Data were analyzed using FlowJo version 10.9.0. To determine the memory T cell subsets, PBMC were  
60 stained with Zombie yellow (Biolegend), CD3 Viogreen, CD4 Alexa Fluor 700, CD8 VioBlue, CD45RA  
61 VioBright 515, CD45RO APC-Vio770, CD197 (CCR7) APC, CD27 PE-Vio770 and CD62L PE and analyzed  
62 on a BD FACSSymphony A1 flow cytometer (BD Biosciences). Exclusion of debris was performed by  
63 gating on FSC/SSC characteristics, followed by gating out dead cells. Next, total T cells were gated as  
64 CD3<sup>+</sup> cells, followed by gating CD4<sup>+</sup> T cells (CD4<sup>+</sup> CD8<sup>-</sup>) and CD8<sup>+</sup> T cells (CD4<sup>-</sup> CD8<sup>+</sup>). On both the CD4<sup>+</sup>  
65 and CD8<sup>+</sup> T cells, memory T cell subsets were analyzed. Naïve T cells were defined as CD45RA<sup>+</sup> CD45RO<sup>-</sup>  
66 CCR7<sup>+</sup> CD62L<sup>+</sup> CD27<sup>+</sup> cells. Stem cell memory T cells (SCM) were characterized as CD45RA<sup>+</sup> CD45RO<sup>+</sup>  
67 CCR7<sup>+</sup> CD62L<sup>+</sup> CD27<sup>+</sup>. Central memory T cells (CM) were identified as CD45RA<sup>-</sup> CD45RO<sup>+</sup> CCR7<sup>+</sup> CD62L<sup>+</sup>  
68 CD27<sup>+</sup> cells. Effector memory T cells (EM) consisted of CD45RA<sup>-</sup> CD45RO<sup>+</sup> CCR7<sup>-</sup> CD62L<sup>-</sup> CD27<sup>+/-</sup> cells.  
69 Finally, terminally differentiated effector T cells (TE) were determined as CD45RA<sup>+</sup> CD45RO<sup>-</sup> CCR7<sup>-</sup>  
70 CD62L<sup>-</sup> CD27<sup>-</sup> cells. Frequencies of the different subsets are shown as percentage of CD4<sup>+</sup> and CD8<sup>+</sup> T  
71 cells respectively. Data were analyzed using FlowJo version 10.9.0.

## 72 *Multiplex immunohistochemistry staining*

73 A CD4/CD8/CD20/Foxp3/CD68/SOX10 mIHC staining was performed manually on 4 µm FFPE biopsy  
74 sections using Opal reagents (Akoya Biosciences, Menlo Park, CA) in 3 batches including for each batch  
75 a 4 µm FFPE melanoma lymph node metastasis section as a staining and quantification quality control.

76 Briefly, the tissue sections mounted on Superfrost Plus slides (Menzel-Glaser) were deparaffinized with  
77 xylene, hydrated through an ethanol gradient and fixed in 10% neutral buffer formalin for 20 min.  
78 Heat-induced antigen retrieval was achieved in Antigen Retrieval (AR) 9 buffer (Akoya Biosciences)  
79 using a microwave (Panasonic with Inverter technology). The slides were brought to a boil at 100%  
80 power followed by 10% power for 15 min and then left to cool at least for 15 min. The tissue sections  
81 were blocked (Opal Antibody Diluent/Block, Akoya Biosciences) for 10 min and then incubated with  
82 the primary antibody for 1H30. The horseradish peroxidase (HRP)-conjugated secondary polymer (anti-  
83 mouse/anti-rabbit, Akoya Biosciences) was applied on tissue sections for 10 min and finally tissue  
84 sections were incubated with the HRP-reactive Opal fluorophore for 10 min (Akoya Biosciences). Heat-  
85 induced antibody removal was achieved in AR6 buffer (Akoya Biosciences) using the previous  
86 microwave treatment. The staining cycles were repeated until all markers were stained as described  
87 in **Supplementary Table 1**.

88 The slides were washed between each step in 0.05% Tris-Buffered Saline–Tween 20 three times at 2  
89 min each. After the final staining cycle, the nuclei were counterstained with spectral DAPI (Akoya  
90 Biosciences) for 5 min and the slides were mounted in the ProLong Diamond Antifade Mountant  
91 (Invitrogen).

#### 92 *Multiplex IHC Acquisition and Quantification (cont.)*

93 Quantification algorithms were created using the positive control MSI and 10 MSI of batch 1 containing  
94 positive cells for each marker. In general, tissue was segmented into three categories “no tissue”,  
95 “peritumoral” and “tumor” based on DAPI and Sox10 staining. Cell segmentation was based on DAPI  
96 staining and assisted by CD4, CD8, CD20 staining. Finally, cell phenotyping was performed by machine  
97 learning. InForm software was trained to recognize positive and negative cells for each marker. The  
98 phenotyping of CD4, CD20 and Sox10 were achieved in the same algorithm since positive staining for  
99 these markers is on different cells. For phenotyping of CD8, CD68 and FOXP3, one algorithm by marker  
100 was created while keeping the same tissue and cell segmentation settings.

101 As there may be staining variations between batches, the quantification algorithms created with batch  
102 1 MSI were tested on positive control MSI of batch 2 and 3. Staining intensity and percentage of  
103 positive cells for each marker were compared between batch 1, 2 and 3 MSI from the same tissue  
104 areas. Similar staining intensity and percentage of positive cells were found for each marker between  
105 batch 1, 2 and 3 MSI expect for CD20 and CD8 staining of batch 2. For these two markers new  
106 quantification algorithms using the positive control MSI and MSI of batch 2 were created to improve  
107 cell detection.
